# Supplementary material for: Hybrid Vesicle Stability under Sterilisation and Preservation Processes Used in the Manufacture of Medicinal Formulations
Source: PubMed Central journal article supplement (PMC7240416; doi:10.3390/polym12040914), 2020-04-15
Supplement: polymers-12-00914-s001.pdf [file polymers-12-00914-s001.pdf]

# Hybrid Vesicle Stability under Sterilisation and Preservation Processes Used in the Manufacture of Medicinal Formulations

Rashmi Seneviratne, Lars J.C. Jeuken, Michael Rappolt and Paul A. Beales

**Table S1.** DLS fitting data of PBd<sub>12</sub>-PEO<sub>11</sub> hybrid vesicles before five filtration cycles for Figure 3c.

| PBd <sub>12</sub> -PEO <sub>11</sub><br>(mol%) | Z-average (d.nm) |                    | Average Intensity Diameter (d.nm) |                    | PDI     |                    |
|------------------------------------------------|------------------|--------------------|-----------------------------------|--------------------|---------|--------------------|
|                                                | Average          | Standard Deviation | Average                           | Standard Deviation | Average | Standard Deviation |
| 0                                              | 123.2            | 120.0              | 131.9                             | 7.7                | 0.096   | 0.018              |
| 25                                             | 107.8            | 0.1                | 122.5                             | 0.6                | 0.120   | 0.011              |
| 50                                             | 95.7             | 4.3                | 115.2                             | 4.6                | 0.163   | 0.014              |
| 75                                             | 90.4             | 1.8                | 110.6                             | 1.8                | 0.174   | 0.003              |
| 100                                            | 99.8             | 3.8                | 122.7                             | 6.8                | 0.183   | 0.015              |

**Table S2.** DLS fitting data of PBd<sub>22</sub>-PEO<sub>14</sub> hybrid vesicles before five filtration cycles for Figure 3c.

| PBd <sub>22</sub> -PEO <sub>14</sub><br>(mol%) | Z-average (d.nm) |                    | Average Intensity Diameter (d.nm) |                    | PDI     |                    |
|------------------------------------------------|------------------|--------------------|-----------------------------------|--------------------|---------|--------------------|
|                                                | Average          | Standard Deviation | Average                           | Standard Deviation | Average | Standard Deviation |
| 0                                              | 123.2            | 120.0              | 131.9                             | 7.7                | 0.096   | 0.018              |
| 25                                             | 97.2             | 1.5                | 114.5                             | 6.0                | 0.154   | 0.003              |
| 50                                             | 108.0            | 2.1                | 138.9                             | 2.4                | 0.213   | 0.022              |
| 75                                             | 114.8            | 5.4                | 135.3                             | 5.8                | 0.145   | 0.018              |
| 100                                            | 160.8            | 17.0               | 189.0                             | 21.1               | 0.16    | 0.044              |

**Table S3.** DLS fitting data of PBd<sub>12</sub>-PEO<sub>11</sub> hybrid vesicles after five filtration cycles for Figure 3c.

| PBd <sub>12</sub> -PEO <sub>11</sub><br>(mol%) | Z-average (d.nm) |                    | Average Intensity Diameter (d.nm) |                    | PDI     |                    |
|------------------------------------------------|------------------|--------------------|-----------------------------------|--------------------|---------|--------------------|
|                                                | Average          | Standard Deviation | Average                           | Standard Deviation | Average | Standard Deviation |
| 0                                              | 121.8            | 9.3                | 132.0                             | 7.8                | 0.085   | 0.024              |
| 25                                             | 107.6            | 1.7                | 126.3                             | 5.3                | 0.134   | 0.002              |
| 50                                             | 96.1             | 5.3                | 1595.4                            | 2643.2             | 0.180   | 0.017              |
| 75                                             | 124.0            | 57.7               | 287.8                             | 306.4              | 0.218   | 0.083              |
| 100                                            | 99.6             | 1.2                | 127.4                             | 0.7                | 0.204   | 0.011              |

**Table S4.** DLS fitting data of PBd<sub>22</sub>-PEO<sub>14</sub> hybrid vesicles after five filtration cycles for Figure 3c.

| PBd <sub>22</sub> -PEO <sub>14</sub><br>(mol%) | Z-average (d.nm) |                    | Average Intensity Diameter (d.nm) |                    | PDI     |                    |
|------------------------------------------------|------------------|--------------------|-----------------------------------|--------------------|---------|--------------------|
|                                                | Average          | Standard Deviation | Average                           | Standard Deviation | Average | Standard Deviation |
| 0                                              | 121.8            | 9.3                | 132.0                             | 7.8                | 0.085   | 0.024              |
| 25                                             | 96.1             | 0.8                | 111.2                             | 2.5                | 0.147   | 0.013              |
| 50                                             | 105.9            | 2.0                | 132.4                             | 1.0                | 0.185   | 0.015              |
| 75                                             | 116.8            | 4.8                | 137.2                             | 5.9                | 0.137   | 0.010              |
| 100                                            | 149.1            | 1.8                | 176.0                             | 3.3                | 0.145   | 0.011              |

**Table S5.** DLS fitting data of PBd<sub>12</sub>-PEO<sub>11</sub> hybrid vesicles before five filtration cycles for Figure 4c.

| PBd <sub>12</sub> -PEO <sub>11</sub><br>(mol%) | Z-average (d.nm) |                       | Average Intensity<br>Diameter (d.nm) |                       | PDI     |                       |
|------------------------------------------------|------------------|-----------------------|--------------------------------------|-----------------------|---------|-----------------------|
|                                                | Average          | Standard<br>Deviation | Average                              | Standard<br>Deviation | Average | Standard<br>Deviation |
| 0                                              | 318.8            | 36.5                  | 263.5                                | 34.5                  | 0.417   | 0.050                 |
| 50                                             | 106.9            | 1.0                   | 1588.6                               | 850.9                 | 0.247   | 0.002                 |
| 100                                            | 160.6            | 68.5                  | 2448.7                               | 1354.4                | 0.221   | 0.135                 |

**Table S6.** DLS fitting data of PBd<sub>22</sub>-PEO<sub>14</sub> hybrid vesicles before five filtration cycles for Figure 4c.

| PBd <sub>22</sub> -PEO <sub>14</sub><br>(mol%) | Z-average (d.nm) |                       | Average Intensity<br>Diameter (d.nm) |                       | PDI     |                       |
|------------------------------------------------|------------------|-----------------------|--------------------------------------|-----------------------|---------|-----------------------|
|                                                | Average          | Standard<br>Deviation | Average                              | Standard<br>Deviation | Average | Standard<br>Deviation |
| 0                                              | 318.8            | 36.5                  | 263.5                                | 34.5                  | 0.417   | 0.050                 |
| 50                                             | 123.7            | 0.9                   | 182.2                                | 8.5                   | 0.279   | 0.014                 |
| 100                                            | 261.4            | 87.4                  | 1447.4                               | 948.3                 | 0.491   | 0.055                 |

**Table S7.** DLS fitting data of PBd<sub>12</sub>-PEO<sub>11</sub> hybrid vesicles after five filtration cycles for Figure 4c.

| PBd <sub>12</sub> -PEO <sub>11</sub><br>(mol%) | Z-average (d.nm) |                       | Average Intensity<br>Diameter (d.nm) |                       | PDI     |                       |
|------------------------------------------------|------------------|-----------------------|--------------------------------------|-----------------------|---------|-----------------------|
|                                                | Average          | Standard<br>Deviation | Average                              | Standard<br>Deviation | Average | Standard<br>Deviation |
| 0                                              | 822.9            | 856.1                 | 719.9                                | 555.9                 | 0.493   | 0.444                 |
| 50                                             | 94.4             | 8.3                   | 120.1                                | 35.0                  | 0.211   | 0.004                 |
| 100                                            | 227.6            | 169.4                 | 2291.5                               | 1123.4                | 0.447   | 0.417                 |

**Table S8.** DLS fitting data of PBd<sub>22</sub>-PEO<sub>14</sub> hybrid vesicles after five filtration cycles for Figure 4c.

| PBd <sub>22</sub> -PEO <sub>14</sub><br>(mol%) | Z-average (d.nm) |                       | Average Intensity<br>Diameter (d.nm) |                       | PDI     |                       |
|------------------------------------------------|------------------|-----------------------|--------------------------------------|-----------------------|---------|-----------------------|
|                                                | Average          | Standard<br>Deviation | Average                              | Standard<br>Deviation | Average | Standard<br>Deviation |
| 0                                              | 822.9            | 856.1                 | 719.9                                | 555.9                 | 0.493   | 0.444                 |
| 50                                             | 119.8            | 30.2                  | 164.9                                | 47.9                  | 0.269   | 0.029                 |
| 100                                            | 579.4            | 707.4                 | 798.75                               | 699.9                 | 0.524   | 0.225                 |

**Table S9.** DLS fitting data of PBd<sub>12</sub>-PEO<sub>11</sub> hybrid vesicles before four FTV cycles for Figure 6c.

| PBd <sub>12</sub> -PEO <sub>11</sub><br>(mol%) | Z-average (d.nm) |                       | Average Intensity<br>Diameter (d.nm) |                       | PDI     |                       |
|------------------------------------------------|------------------|-----------------------|--------------------------------------|-----------------------|---------|-----------------------|
|                                                | Average          | Standard<br>Deviation | Average                              | Standard<br>Deviation | Average | Standard<br>Deviation |
| 0                                              | 123.2            | 120.0                 | 131.9                                | 7.7                   | 0.096   | 0.018                 |
| 25                                             | 107.8            | 0.1                   | 122.5                                | 0.6                   | 0.120   | 0.011                 |
| 50                                             | 95.7             | 4.3                   | 115.2                                | 4.6                   | 0.163   | 0.014                 |
| 75                                             | 90.4             | 1.8                   | 110.6                                | 1.8                   | 0.174   | 0.003                 |
| 100                                            | 99.8             | 3.8                   | 122.7                                | 6.8                   | 0.183   | 0.015                 |

**Table S10.** DLS fitting data of PBd<sub>22</sub>-PEO<sub>14</sub> hybrid vesicles after four FTV cycles for Figure 6c.

| PBd <sub>22</sub> -PEO <sub>14</sub><br>(mol%) | Z-average (d.nm) |                       | Average Intensity<br>Diameter (d.nm) |                       | PDI     |                       |
|------------------------------------------------|------------------|-----------------------|--------------------------------------|-----------------------|---------|-----------------------|
|                                                | Average          | Standard<br>Deviation | Average                              | Standard<br>Deviation | Average | Standard<br>Deviation |
| 0                                              | 123.2            | 120.0                 | 131.9                                | 7.7                   | 0.096   | 0.018                 |
| 25                                             | 97.2             | 1.5                   | 114.5                                | 6.0                   | 0.154   | 0.003                 |
| 50                                             | 108.0            | 2.1                   | 138.9                                | 2.4                   | 0.213   | 0.022                 |
| 75                                             | 114.8            | 5.4                   | 135.3                                | 5.8                   | 0.145   | 0.018                 |
| 100                                            | 160.8            | 17.0                  | 189.0                                | 21.1                  | 0.16    | 0.044                 |

**Table S11.** DLS fitting data of PBd<sub>12</sub>-PEO<sub>11</sub> hybrid vesicles after four FTV cycles for Figure 6c.

| PBd <sub>12</sub> -PEO <sub>11</sub><br>(mol%) | Z-average (d.nm) |                       | Average Intensity<br>Diameter (d.nm) |                       | PDI     |                       |
|------------------------------------------------|------------------|-----------------------|--------------------------------------|-----------------------|---------|-----------------------|
|                                                | Average          | Standard<br>Deviation | Average                              | Standard<br>Deviation | Average | Standard<br>Deviation |
| 0                                              | 116.8            | 19.5                  | 136.2                                | 32.9                  | 0.135   | 0.074                 |
| 25                                             | 82.3             | 5.3                   | 93.5                                 | 2.5                   | 0.168   | 0.009                 |
| 50                                             | 81.7             | 2.0                   | 100.5                                | 2.3                   | 0.178   | 0.007                 |
| 75                                             | 80.6             | 2.0                   | 98.4                                 | 0.9                   | 0.172   | 0.009                 |
| 100                                            | 90.9             | 1.6                   | 109.6                                | 7.4                   | 0.177   | 0.015                 |

**Table S12.** DLS fitting data of PBd<sub>22</sub>-PEO<sub>14</sub> hybrid vesicles after four FTV cycles for Figure 6c.

| PBd <sub>22</sub> -PEO <sub>14</sub><br>(mol%) | Z-average (d.nm) |                       | Average Intensity<br>Diameter (d.nm) |                       | PDI     |                       |
|------------------------------------------------|------------------|-----------------------|--------------------------------------|-----------------------|---------|-----------------------|
|                                                | Average          | Standard<br>Deviation | Average                              | Standard<br>Deviation | Average | Standard<br>Deviation |
| 0                                              | 116.8            | 19.5                  | 136.2                                | 32.9                  | 0.135   | 0.074                 |
| 25                                             | 379.3            | 511.2                 | 863.8                                | 886.8                 | 0.26    | 0.119                 |
| 50                                             | 101.0            | 1.4                   | 125.4                                | 1.1                   | 0.191   | 0.016                 |
| 75                                             | 157.2            | 75.0                  | 313.5                                | 312.5                 | 0.260   | 0.210                 |
| 100                                            | 154.2            | 4.8                   | 181.4                                | 8.0                   | 0.139   | 0.015                 |
